# Supplementary material for: Relationship between caffeine intake and autosomal dominant polycystic kidney disease progression: a retrospective analysis using the CRISP cohort
Source: Springer Nature journal article supplement (doi:10.1186/s12882-018-1182-0), 2018-12-01
Supplement: MOESM1 [file 16359662]

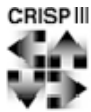

Attention - DO NOT enter patient data on this form if the header does not contain preprinted CRISP ID number, clinical center ID, and visit number.

Participant ID: \_\_\_\_\_ *pkdid*  
visit:

Clinical Center: \_\_\_\_\_ *pccn*

Missing Data Codes: A-Participant Refused B-Reading Not Possible C-Institutional Error

## Biannual Clinic Visit/Meds and Events

This form is to be completed at Visits 10 and 12.

|                                                                                                                                                    |                                                                                                                                                                                                 |                                                                                                                                                        |                                |                                       |                                                                                   |
|----------------------------------------------------------------------------------------------------------------------------------------------------|-------------------------------------------------------------------------------------------------------------------------------------------------------------------------------------------------|--------------------------------------------------------------------------------------------------------------------------------------------------------|--------------------------------|---------------------------------------|-----------------------------------------------------------------------------------|
| <b>1.</b>                                                                                                                                          | <b>Date of visit</b> <i>dvdate</i>                                                                                                                                                              | <input type="text"/> <input type="text"/> / <input type="text"/> <input type="text"/> / <input type="text"/> <input type="text"/> <input type="text"/> |                                |                                       |                                                                                   |
| <b>2.</b>                                                                                                                                          | <b>Since last contact, has the participant had any illnesses?</b> <i>ilyn</i>                                                                                                                   | 0 <input type="checkbox"/> No                                                                                                                          | 1 <input type="checkbox"/> Yes |                                       |                                                                                   |
| <b>(Go to #3)</b>                                                                                                                                  |                                                                                                                                                                                                 |                                                                                                                                                        |                                |                                       |                                                                                   |
| If yes, please specify briefly: <i>ill</i> _____                                                                                                   |                                                                                                                                                                                                 |                                                                                                                                                        |                                |                                       |                                                                                   |
| _____                                                                                                                                              |                                                                                                                                                                                                 |                                                                                                                                                        |                                |                                       |                                                                                   |
| _____                                                                                                                                              |                                                                                                                                                                                                 |                                                                                                                                                        |                                |                                       |                                                                                   |
| <b>2a.</b>                                                                                                                                         | <b>Have you been newly diagnosed with hypertension since last contact?</b> <i>hypert</i>                                                                                                        | 0 <input type="checkbox"/> No                                                                                                                          | 1 <input type="checkbox"/> Yes |                                       |                                                                                   |
| If yes, <b>Date of diagnosis:</b> _____ / _____ / _____ <i>hypyr</i>                                                                               |                                                                                                                                                                                                 |                                                                                                                                                        |                                |                                       |                                                                                   |
| <i>hypmt hypda Month Day Year</i>                                                                                                                  |                                                                                                                                                                                                 |                                                                                                                                                        |                                |                                       |                                                                                   |
| <b>How were you diagnosed with hypertension?</b> <i>hyphdia</i> 1 <input type="checkbox"/> Home BP monitor 2 <input type="checkbox"/> Doctor visit |                                                                                                                                                                                                 |                                                                                                                                                        |                                |                                       |                                                                                   |
| 3 <input type="checkbox"/> Hospital stay 4 <input type="checkbox"/> Other Specify: _____ <i>hypspc</i>                                             |                                                                                                                                                                                                 |                                                                                                                                                        |                                |                                       |                                                                                   |
| <b>2b.</b>                                                                                                                                         | <b>Since last contact, have you been told by a doctor or other health professional that you have diabetes or high blood sugar (If female, other than during pregnancy)?</b> <i>diablowsugar</i> | 0 <input type="checkbox"/> No                                                                                                                          | 1 <input type="checkbox"/> Yes | 2 <input type="checkbox"/> Don't Know | 9998 <input type="checkbox"/> Missing                                             |
| If no or don't know, and male participant, go to 3.                                                                                                |                                                                                                                                                                                                 |                                                                                                                                                        |                                |                                       |                                                                                   |
| If no or don't know, and female participant, go to 2c.                                                                                             |                                                                                                                                                                                                 |                                                                                                                                                        |                                |                                       |                                                                                   |
| If yes, date: _____ / _____ / _____ <i>diablowsugarmt</i>                                                                                          |                                                                                                                                                                                                 |                                                                                                                                                        |                                |                                       |                                                                                   |
| <i>diablowsugarda diablowsugaryr</i>                                                                                                               |                                                                                                                                                                                                 |                                                                                                                                                        |                                |                                       |                                                                                   |
| If male participant, go to 2d.                                                                                                                     |                                                                                                                                                                                                 |                                                                                                                                                        |                                |                                       |                                                                                   |
| <b>2c.</b>                                                                                                                                         | <b>Since last contact, have you been told by a doctor or other health professional that you have/had diabetes during pregnancy?</b> <i>diabpregn</i>                                            | 0 <input type="checkbox"/> No                                                                                                                          | 1 <input type="checkbox"/> Yes | 2 <input type="checkbox"/> Don't Know | 9998 <input type="checkbox"/> Missing                                             |
| If 2c=no or don't know, go to 3.                                                                                                                   |                                                                                                                                                                                                 |                                                                                                                                                        |                                |                                       |                                                                                   |
| If yes, date: _____ / _____ / _____ <i>diabpregnmt</i>                                                                                             |                                                                                                                                                                                                 |                                                                                                                                                        |                                |                                       |                                                                                   |
| <i>diabpregnda diabpregnyr</i>                                                                                                                     |                                                                                                                                                                                                 |                                                                                                                                                        |                                |                                       |                                                                                   |
| <b>2d.</b>                                                                                                                                         | <b>Since last contact, have you taken medications for diabetes?</b> <i>diabmed</i>                                                                                                              | 0 <input type="checkbox"/> No                                                                                                                          | 1 <input type="checkbox"/> Yes | 2 <input type="checkbox"/> Don't Know | 777 <input type="checkbox"/> Not Applicable 9998 <input type="checkbox"/> Missing |



Attention - DO NOT enter patient data on this form if the header does not contain preprinted CRISP ID number, clinical center ID, and visit number.

Participant ID: \_\_\_\_\_ *pkdid*  
visit:

Clinical Center: \_\_\_\_\_ *pccn*

Missing Data Codes: A-Participant Refused B-Reading Not Possible C-Institutional Error

## Biannual Clinic Visit/Meds and Events

If yes, medications:

\_\_\_\_\_ *diabmed1*  
 \_\_\_\_\_ *diabmed2*  
 \_\_\_\_\_ *diabmed3*  
 \_\_\_\_\_ *diabmed4*  
 \_\_\_\_\_ *diabmed5*

2e. Since last contact, have you taken diabetic pills (also called hypoglycemic agents) to lower your blood sugar? *diabpills*

0  No      1  Yes      2  Don't Know      777  Not Applicable      9998  Missing

2f. Since last contact, have you taken insulin? *insulin*

0  No      1  Yes      2  Don't Know      777  Not Applicable      9998  Missing

3. Since the last contact, has the participant visited their primary care physician? *pvyn*

0  No      1  Yes  
(Go to #4)

If yes, complete Section 3

3a. Date of physician visit: \_\_\_\_/\_\_\_\_/\_\_\_\_ *pvyr*

*pvmt*      *pvda*      Month      Day      Year

3b. Were there multiple visits to this physician? *Mvci*

0  No      1  Yes

3c. Name and address of physician treating participant:

Name: \_\_\_\_\_

Address: \_\_\_\_\_

City, State, Zip: \_\_\_\_\_

3d. Specify reason for visit: *pvreason* \_\_\_\_\_

\_\_\_\_\_  
 \_\_\_\_\_  
 \_\_\_\_\_



Attention - DO NOT enter patient data on this form if the header does not contain preprinted CRISP ID number, clinical center ID, and visit number.

Participant ID: \_\_\_\_\_ *pkdid*  
visit:

Clinical Center: \_\_\_\_\_ *pccn*

Missing Data Codes: A-Participant Refused B-Reading Not Possible C-Institutional Error

## Biannual Clinic Visit/Meds and Events

4. Since last contact, has the participant visited any physician other than the primary care physician listed in question 3? *pvotphyld* 0  No 1  Yes  
(Go to #5)

If yes, complete Section #4

### Physician #1

a. Date of additional physician visit: \_\_\_\_/\_\_\_\_/\_\_\_\_ *pv2yr*  
*pv2mt* *pv2da* Month Day Year

b. Were there multiple visits to this physician? *m2vc* 0  No 1  Yes

c. Name and address of physician treating participant:

Name: \_\_\_\_\_

Address: \_\_\_\_\_

City, State, Zip: \_\_\_\_\_

d. Specify reason for visit: *pv2reason* \_\_\_\_\_  
\_\_\_\_\_  
\_\_\_\_\_

### Physician #2

a. Date of additional physician visit: \_\_\_\_/\_\_\_\_/\_\_\_\_ *pv2yr*  
*pv2mt* *pv2da* Month Day Year

b. Were there multiple visits to this physician? *m2vc* 0  No 1  Yes

c. Name and address of physician treating participant:

Name: \_\_\_\_\_

Address: \_\_\_\_\_

City, State, Zip: \_\_\_\_\_

d. Specify reason for visit: *pv2reason* \_\_\_\_\_  
\_\_\_\_\_  
\_\_\_\_\_



Attention - DO NOT enter patient data on this form if the header does not contain preprinted CRISP ID number, clinical center ID, and visit number.

Participant ID: \_\_\_\_\_ *pkdid*  
visit:

Clinical Center: \_\_\_\_\_ *pccn*

Missing Data Codes: A-Participant Refused B-Reading Not Possible C-Institutional Error

## Biannual Clinic Visit/Meds and Events

### Physician #3

a. Date of additional physician visit: \_\_\_\_/\_\_\_\_/\_\_\_\_ *pv2yr*  
*pv2mt* *pv2da* Month Day Year

b. Were there multiple visits to this physician? *m2vc* 0  No 1  Yes

c. Name and address of physician treating participant:

Name: \_\_\_\_\_

Address: \_\_\_\_\_

City, State, Zip: \_\_\_\_\_

d. Specify reason for visit: *pv2reason* \_\_\_\_\_

\_\_\_\_\_

\_\_\_\_\_

### Physician #4

a. Date of additional physician visit: \_\_\_\_/\_\_\_\_/\_\_\_\_ *pv2yr*  
*pv2mt* *pv2da* Month Day Year

b. Were there multiple visits to this physician? *m2vc* 0  No 1  Yes

c. Name and address of physician treating participant:

Name: \_\_\_\_\_

Address: \_\_\_\_\_

City, State, Zip: \_\_\_\_\_

d. Specify reason for visit: *pv2reason* \_\_\_\_\_

\_\_\_\_\_

\_\_\_\_\_



Attention - DO NOT enter patient data on this form if the header does not contain preprinted CRISP ID number, clinical center ID, and visit number.

Participant ID: \_\_\_\_\_ *pkdid*  
visit:

Clinical Center: \_\_\_\_\_ *pccn*

Missing Data Codes: A-Participant Refused B-Reading Not Possible C-Institutional Error

## Biannual Clinic Visit/Meds and Events

### Physician #5

a. Date of additional physician visit: \_\_\_\_ / \_\_\_\_ / \_\_\_\_ *pv2yr*  
*pv2mt*      *pv2da*      Month    Day      Year

b. Were there multiple visits to this physician? *m2vc*      0  No      1  Yes

c. Name and address of physician treating participant:

Name: \_\_\_\_\_

Address: \_\_\_\_\_

City, State, Zip: \_\_\_\_\_

d. Specify reason for visit: *pv2reason* \_\_\_\_\_

### Physician #6

a. Date of additional physician visit: \_\_\_\_ / \_\_\_\_ / \_\_\_\_ *pv2yr*  
*pv2mt*      *pv2da*      Month    Day      Year

b. Were there multiple visits to this physician? *m2vc*      0  No      1  Yes

c. Name and address of physician treating participant:

Name: \_\_\_\_\_

Address: \_\_\_\_\_

City, State, Zip: \_\_\_\_\_

d. Specify reason for visit: *pv2reason* \_\_\_\_\_



Attention - DO NOT enter patient data on this form if the header does not contain preprinted CRISP ID number, clinical center ID, and visit number.

Participant ID: \_\_\_\_\_ *pkdid*  
visit:

Clinical Center: \_\_\_\_\_ *pccn*

Missing Data Codes: A-Participant Refused B-Reading Not Possible C-Institutional Error

## Biannual Clinic Visit/Meds and Events

### Physician #7

a. Date of additional physician visit: \_\_\_\_ / \_\_\_\_ / \_\_\_\_ *pv2yr*  
*pv2mt* *pv2da* Month Day Year

b. Were there multiple visits to this physician? *m2vc* 0  No 1  Yes

c. Name and address of physician treating participant:

Name: \_\_\_\_\_

Address: \_\_\_\_\_

City, State, Zip: \_\_\_\_\_

d. Specify reason for visit: *pv2reason* \_\_\_\_\_

### Physician #8

a. Date of additional physician visit: \_\_\_\_ / \_\_\_\_ / \_\_\_\_ *pv2yr*  
*pv2mt* *pv2da* Month Day Year

b. Were there multiple visits to this physician? *m2vc* 0  No 1  Yes

c. Name and address of physician treating participant:

Name: \_\_\_\_\_

Address: \_\_\_\_\_

City, State, Zip: \_\_\_\_\_

d. Specify reason for visit: *pv2reason* \_\_\_\_\_



Attention - DO NOT enter patient data on this form if the header does not contain preprinted CRISP ID number, clinical center ID, and visit number.

Participant ID: \_\_\_\_\_ *pkdid*  
visit:

Clinical Center: \_\_\_\_\_ *pccn*

Missing Data Codes: A-Participant Refused B-Reading Not Possible C-Institutional Error

## Biannual Clinic Visit/Meds and Events

### Physician #9

a. Date of additional physician visit: \_\_\_\_ / \_\_\_\_ / \_\_\_\_ *pv2yr*  
*pv2mt* *pv2da* Month Day Year

b. Were there multiple visits to this physician? *m2vc* 0  No 1  Yes

c. Name and address of physician treating participant:

Name: \_\_\_\_\_

Address: \_\_\_\_\_

City, State, Zip: \_\_\_\_\_

d. Specify reason for visit: *pv2reason* \_\_\_\_\_

### Physician #10

a. Date of additional physician visit: \_\_\_\_ / \_\_\_\_ / \_\_\_\_ *pv2yr*  
*pv2mt* *pv2da* Month Day Year

b. Were there multiple visits to this physician? *m2vc0* 0  No 1  Yes

c. Name and address of physician treating participant:

Name: \_\_\_\_\_

Address: \_\_\_\_\_

City, State, Zip: \_\_\_\_\_

d. Specify reason for visit: *pv2reason* \_\_\_\_\_

Please continue on the next page



Attention - DO NOT enter patient data on this form if the header does not contain preprinted CRISP ID number, clinical center ID, and visit number.

Participant ID: \_\_\_\_\_ *pkdid*  
visit:

Clinical Center: \_\_\_\_\_ *pccn*

Missing Data Codes: A-Participant Refused B-Reading Not Possible C-Institutional Error

## Biannual Clinic Visit/Meds and Events

5. Since last contact, has the participant been hospitalized? *hospld* 0  No 1  Yes  
(Go to #6)

If yes, complete Section #5

### Hospitalization #1

a. Was this hospitalization unscheduled? *husch* 0  No 1  Yes  
(See Note)

Note: If unscheduled, please report the event to the local IRB and send a copy to the DCIAC

b. Date admitted to hospital: \_\_\_\_/\_\_\_\_/\_\_\_\_ *hayr*  
*hamt hada* Month Day Year

c. Date discharged from hospital: \_\_\_\_/\_\_\_\_/\_\_\_\_ *hdyr*  
*hdmt hdda* Month Day Year

d. Length of stay (in days) : \_\_\_\_\_ *lenst*

e. Name and address of hospital:

Name: \_\_\_\_\_

Address: \_\_\_\_\_

City, State, Zip: \_\_\_\_\_

f. Name and address of physician treating participant:

Name: \_\_\_\_\_

Address: \_\_\_\_\_

City, State, Zip: \_\_\_\_\_

g. What was the discharge diagnosis? \_\_\_\_\_ *hdiag*

h. Was there any renal surgery performed? *rsurgpyn* 0  No 1  Yes  
If no, go to Hospitalization #2 or Section 6 if no more hospitalizations

If yes, was the intent cyst reduction? *ceducyn* 0  No 1  Yes

i. For any renal surgery provide a date and short description:

Date of intervention: \_\_\_\_/\_\_\_\_/\_\_\_\_ *rsiyr*  
*rsimt rsida* Month Day Year

Description: \_\_\_\_\_ *rsidesc*





Attention - DO NOT enter patient data on this form if the header does not contain preprinted CRISP ID number, clinical center ID, and visit number.

Participant ID: \_\_\_\_\_ *pkdid*  
visit:

Clinical Center: \_\_\_\_\_ *pccn*

Missing Data Codes: A-Participant Refused B-Reading Not Possible C-Institutional Error

## Biannual Clinic Visit/Meds and Events

### Hospitalization #2

a. Was this hospitalization unscheduled? *husch*

0  No

1  Yes  
(See Note)

Note: If unscheduled, please report the event to the local IRB and send a copy to the DCIAC

b. Date admitted to hospital:

\_\_\_\_/\_\_\_\_/\_\_\_\_ *hayr*  
*hamt hada* Month Day Year

c. Date discharged from hospital:

\_\_\_\_/\_\_\_\_/\_\_\_\_ *hdyr*  
*hdmt hdda* Month Day Year

d. Length of stay (in days) : \_\_\_\_\_ *lenst*

e. Name and address of hospital:

Name: \_\_\_\_\_

Address: \_\_\_\_\_

City, State, Zip: \_\_\_\_\_

f. Name and address of physician treating participant:

Name: \_\_\_\_\_

Address: \_\_\_\_\_

City, State, Zip: \_\_\_\_\_

g. What was the discharge diagnosis? \_\_\_\_\_ *hdiag*

h. Was there any renal surgery performed? *resurgpyn*

0  No

1  Yes

*If no, go to Hospitalization #3 or Section 6 if no more hospitalizations*

If yes, was the intent cyst reduction? *ceducyn*

0  No

1  Yes

i. For any renal surgery provide a date and short description:

Date of intervention: \_\_\_\_/\_\_\_\_/\_\_\_\_ *rsiyr*  
*rsimt rsida* Month Day Year

Description: \_\_\_\_\_ *rsidesc*



Attention - DO NOT enter patient data on this form if the header does not contain preprinted CRISP ID number, clinical center ID, and visit number.

Participant ID: \_\_\_\_\_ *pkdid*  
visit:

Clinical Center: \_\_\_\_\_ *pccn*

Missing Data Codes: A-Participant Refused B-Reading Not Possible C-Institutional Error

## Biannual Clinic Visit/Meds and Events

### Hospitalization #3

a. Was this hospitalization unscheduled? *husch*

0  No

1  Yes  
(See Note)

Note: If unscheduled, please report the event to the local IRB and send a copy to the DCIAC

b. Date admitted to hospital:

\_\_\_\_/\_\_\_\_/\_\_\_\_ *hayr*  
*hamt hada* Month Day Year

c. Date discharged from hospital:

\_\_\_\_/\_\_\_\_/\_\_\_\_ *hdyr*  
*hdmt hdda* Month Day Year

d. Length of stay (in days) : \_\_\_\_\_ *lenst*

e. Name and address of hospital:

Name: \_\_\_\_\_

Address: \_\_\_\_\_

City, State, Zip: \_\_\_\_\_

f. Name and address of physician treating participant:

Name: \_\_\_\_\_

Address: \_\_\_\_\_

City, State, Zip: \_\_\_\_\_

g. What was the discharge diagnosis? \_\_\_\_\_ *hdiag*

h. Was there any renal surgery performed? *rsurgpyn*

0  No

1  Yes

*If no, go to Hospitalization #4 or Section 6 if no more hospitalizations*

If yes, was the intent cyst reduction? *ceducyn*

0  No

1  Yes

i. For any renal surgery provide a date and short description:

Date of intervention: \_\_\_\_/\_\_\_\_/\_\_\_\_ *rsiyr*  
*rsimt rsida* Month Day Year

Description: \_\_\_\_\_ *rsidesc*



Attention - DO NOT enter patient data on this form if the header does not contain preprinted CRISP ID number, clinical center ID, and visit number.

Participant ID: \_\_\_\_\_ *pkdid*  
visit:

Clinical Center: \_\_\_\_\_ *pccn*

Missing Data Codes: A-Participant Refused B-Reading Not Possible C-Institutional Error

## Biannual Clinic Visit/Meds and Events

### Hospitalization #4

a. Was this hospitalization unscheduled? *husch*

0  No

1  Yes  
(See Note)

Note: If unscheduled, please report the event to the local IRB and send a copy to the DCIAC

b. Date admitted to hospital: \_\_\_\_\_ / \_\_\_\_\_ / \_\_\_\_\_ *hayr*  
*hamt hada* Month Day Year

c. Date discharged from hospital: \_\_\_\_\_ / \_\_\_\_\_ / \_\_\_\_\_ *hdyr*  
*hdmt hdda* Month Day Year

d. Length of stay (in days) : \_\_\_\_\_ *lenst*

e. Name and address of hospital:

Name: \_\_\_\_\_

Address: \_\_\_\_\_

City, State, Zip: \_\_\_\_\_

f. Name and address of physician treating participant:

Name: \_\_\_\_\_

Address: \_\_\_\_\_

City, State, Zip: \_\_\_\_\_

g. What was the discharge diagnosis? \_\_\_\_\_ *hdiag*

h. Was there any renal surgery performed? *rsurgpyn*

0  No

1  Yes

(Go to #6)

If yes, was the intent cyst reduction? *ceducyn*

0  No

1  Yes

i. For any renal surgery provide a date and short description:

Date of intervention: \_\_\_\_\_ / \_\_\_\_\_ / \_\_\_\_\_ *rsiyr*  
*rsimt rsida* Month Day Year

Description: \_\_\_\_\_ *rsidesc*



Attention - DO NOT enter patient data on this form if the header does not contain preprinted CRISP ID number, clinical center ID, and visit number.

Participant ID: \_\_\_\_\_ *pkdid*  
visit:

Clinical Center: \_\_\_\_\_ *pccn*

Missing Data Codes: A-Participant Refused B-Reading Not Possible C-Institutional Error

## Biannual Clinic Visit/Meds and Events

|                                                                                                                         |                                                                                                          |
|-------------------------------------------------------------------------------------------------------------------------|----------------------------------------------------------------------------------------------------------|
| <b>6. Smoking and Tobacco:</b>                                                                                          |                                                                                                          |
| <b>6a. Has the participant ever smoked cigarettes?</b> <i>csyn</i>                                                      | 0 <input type="checkbox"/> No      1 <input type="checkbox"/> Yes<br><b>(Go to # 6e)</b>                 |
| <b>6b. If yes,</b> <i>csevsm</i>                                                                                        |                                                                                                          |
| 1 <input type="checkbox"/> Current <b>(Go to #6d)</b>                                                                   |                                                                                                          |
| 2 <input type="checkbox"/> Former, quit since last visit <b>(Go to #6c)</b>                                             |                                                                                                          |
| 3 <input type="checkbox"/> Former, quit prior to last visit <b>(Go to #6c)</b>                                          |                                                                                                          |
| <b>6c. If former smoker, quit date:</b> ___/___/___ <b>(Go to #6e)</b><br><i>qsm</i> Month      Year <i>qsy</i>         |                                                                                                          |
| <b>6d. If current smoker, how many packs per year does the participant smoke?</b> <i>ppy</i>                            | _____                                                                                                    |
| <b>6e. Has the participant used any other types of tobacco since last contact?</b>                                      | 0 <input type="checkbox"/> No      1 <input type="checkbox"/> Yes<br><b>(Go to #7a)</b><br><i>otytab</i> |
| <b>6f. If yes, which types?</b>                                                                                         |                                                                                                          |
| <b>6g. Cigars</b>                                                                                                       | 0 <input type="checkbox"/> No <i>cigar</i><br>1 <input type="checkbox"/> Yes                             |
| <b>6h. If yes, how many cigars since the last contact?</b> ___ <i>cignm</i>                                             |                                                                                                          |
| <b>6i. Pipe</b>                                                                                                         | 0 <input type="checkbox"/> No <i>pipeyn</i><br>1 <input type="checkbox"/> Yes                            |
| <b>6j. Chewing Tobacco/Snuff</b>                                                                                        | 0 <input type="checkbox"/> No <i>chewyn</i><br>1 <input type="checkbox"/> Yes                            |
| <b>7. Caffeinated Beverages:</b>                                                                                        |                                                                                                          |
| <b>7a. Does the participant drink caffeinated coffee or tea?</b> <i>cucaff</i>                                          | 0 <input type="checkbox"/> No      1 <input type="checkbox"/> Yes<br><b>(Go to #7b)</b>                  |
| <i>If yes, check time interval and enter the average number of caffeinated 8 ounce cups per Interval:</i> <i>cupcaf</i> |                                                                                                          |
| 0 <input type="checkbox"/> Per day                                                                                      | <b>Number of 8 ounce cups per interval</b> ___ <i>ccafunit</i>                                           |
| 1 <input type="checkbox"/> Per week                                                                                     |                                                                                                          |
| 2 <input type="checkbox"/> Per month                                                                                    |                                                                                                          |



Attention - DO NOT enter patient data on this form if the header does not contain preprinted CRISP ID number, clinical center ID, and visit number.

Participant ID: \_\_\_\_\_ *pkdid*  
visit:

Clinical Center: \_\_\_\_\_ *pccn*

Missing Data Codes: A-Participant Refused B-Reading Not Possible C-Institutional Error

## Biannual Clinic Visit/Meds and Events

**7b. Does the participant drink other caffeinated beverages?** *cafotbv* 0  No 1  Yes  
(Go to #7c)

If yes, check time interval and enter the average number of caffeinated 12 ounce portions per interval: *glassc*

0  Per day  
1  Per week    **Number of 12 ounce portions per interval** \_\_\_\_ *scafunit*  
2  Per month

**7c. Does the participant drink alcohol?** *alcdr* 0  No 1  Yes  
(Go to #8)

If yes, check time interval and enter the average number of alcoholic drinks per interval: *nad*

(1 drink=any of the following: 12 ounces of beer, 4 ounces of wine, 1.5 ounces liquor)

0  Per day  
1  Per week    **Number of drinks per interval** \_\_\_\_ *alconit*  
2  Per month

**8. Analgesic Use History:** Record the average number per month over the last year. 0=Participant doesn't use

**8a. Acetaminophen tablets:** \_\_\_\_ *acett*  
Avg. number per month

**8b. Aspirin Tablets:** \_\_\_\_ *asprt*  
Avg. number per month

**8c. Combination analgesics:** \_\_\_\_ *combot*  
Avg. number per month

**8d. NSAIDs:** \_\_\_\_ *nsaidt*  
Avg. number per month

**8e. Medical use of marijuana:** \_\_\_\_ *dum*  
Avg. Number per month

**8f. Cox2 Inhibitors** \_\_\_\_ *cox2*  
Avg. number per month

**9. Has the participant used recreational drugs in the last year?** *illdrg* 0  No 1  Yes

If yes, check all that apply

- Heroin *duh*
- Marijuana *duma*
- Methamphetamine *dumeth*
- Cocaine *duc*
- Other *duo*

If other, specify: \_\_\_\_\_ *othr*



Attention - DO NOT enter patient data on this form if the header does not contain preprinted CRISP ID number, clinical center ID, and visit number.

Participant ID: \_\_\_\_\_ *pkdid*  
*visit:*

Clinical Center: \_\_\_\_\_ *pccn*

Missing Data Codes: A-Participant Refused B-Reading Not Possible C-Institutional Error

## Biannual Clinic Visit/Meds and Events

**If this is Visit 10 and the participant is in Crisp II, or if this is Visit 12, Go to # 11.**

**If this is Visit 10 and the participant is in Crisp I only,**

**10. List all current prescription medications, over the counter medications and all natural products/protein supplements,**

**and then STOP**

### Prescribed Medications

*presld*

*pres*

|  |
|--|
|  |
|  |
|  |
|  |
|  |
|  |
|  |
|  |
|  |

### Over the Counter Medications

*octld*

*oct*

|  |
|--|
|  |
|  |
|  |
|  |
|  |
|  |
|  |
|  |
|  |

### All Natural Products/ Protein Supplements

*nppld*

*npp*

|  |
|--|
|  |
|  |
|  |
|  |
|  |
|  |
|  |
|  |
|  |







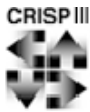

Attention - DO NOT enter patient data on this form if the header does not contain preprinted CRISP ID number, clinical center ID, and visit number.

Participant ID: \_\_\_\_\_ *pkdid*  
visit:

Clinical Center: \_\_\_\_\_ *pccn*

Missing Data Codes: A-Participant Refused B-Reading Not Possible C-Institutional Error

## Biannual Clinic Visit/Meds and Events

### 12. Over-the-counter medications changes:

#### 12a. Since last contact, have OTC drugs been added? *omald*

If yes, then please record:

| OTC Medications <b>added</b> | Date (month/year)                         |
|------------------------------|-------------------------------------------|
| <i>oma</i>                   | <i>domamt</i> ___ / ___ ___ <i>domayr</i> |
|                              |                                           |
|                              |                                           |
|                              |                                           |
|                              |                                           |
|                              |                                           |
|                              |                                           |
|                              |                                           |

#### 12b. Since last contact, have OTC drugs been stopped/discontinued? *omdlld*

If yes, then please record:

| OTC Medications <b>discontinued</b> | Date (month/year)                         |
|-------------------------------------|-------------------------------------------|
| <i>omd</i>                          | <i>domdmt</i> ___ / ___ ___ <i>domdyr</i> |
|                                     |                                           |
|                                     |                                           |
|                                     |                                           |
|                                     |                                           |



Attention - DO NOT enter patient data on this form if the header does not contain preprinted CRISP ID number, clinical center ID, and visit number.

Participant ID: \_\_\_\_\_ *pkdid*  
visit:

Clinical Center: \_\_\_\_\_ *pccn*

Missing Data Codes: A-Participant Refused B-Reading Not Possible C-Institutional Error

## Biannual Clinic Visit/Meds and Events

|                                                                                                  |                                         |
|--------------------------------------------------------------------------------------------------|-----------------------------------------|
| <b>13. Natural Product Use Changes:</b>                                                          |                                         |
| <b>13a. Since last contact, have Natural Products/Protein Supplements been added?</b> <i>nma</i> |                                         |
| <i>If yes, then please record:</i>                                                               |                                         |
| Natural Products/Protein Supplements <b>added</b>                                                | Date (month/year)                       |
| <i>nma</i>                                                                                       | <i>dnmant</i> ___/___/___ <i>dnmayr</i> |
|                                                                                                  |                                         |
|                                                                                                  |                                         |
|                                                                                                  |                                         |
|                                                                                                  |                                         |

|                                                                                                                   |                                         |
|-------------------------------------------------------------------------------------------------------------------|-----------------------------------------|
| <b>13b. Since last contact, have Natural Products/Protein Supplements been stopped/discontinued?</b> <i>nmdld</i> |                                         |
| <i>If yes, then please record:</i>                                                                                |                                         |
| Natural Products/Protein Supplements <b>discontinued</b>                                                          | Date (month/year)                       |
| <i>nmd</i>                                                                                                        | <i>dnmdmt</i> ___/___/___ <i>dnmdyr</i> |
|                                                                                                                   |                                         |
|                                                                                                                   |                                         |
|                                                                                                                   |                                         |
|                                                                                                                   |                                         |

Please review all contact information on the Identification Form including phone number and email address.

CRISP Member completing this form \_\_\_\_\_ *cdidnum*

Date Form Completed \_\_\_/\_\_\_/\_\_\_ *cddate*

Data Entry Status: Please check to indicate that the above information has been entered

Primary Entered by: \_\_\_\_\_ *deidnum* Date: \_\_\_/\_\_\_/\_\_\_ *dedate*

Secondary Entered by: \_\_\_\_\_ Date \_\_\_/\_\_\_/\_\_\_
